# Supplementary material
Source: publisher site journal article supplement (https://www.dovepress.com/get_supplementary_file.php?f=285359-2.docx)
Supplement: Supplementary file 1 [file get_supplementary_file.php]

Supplementary file 2: Characteristics of scientific abstracts in economic evaluation

|  | Reference | Country | Type of economic evaluation | Effectiveness measure; source | HRU source | Unit cost source |
| --- | --- | --- | --- | --- | --- | --- |
| 1 | Zazaa, A. S., et al. (2009). "Cost-minimization analysis of xelox versus folfox +/- bevacizumab for treatment of metastatic colorectal cancer (MCRC) in Saudi Arabian hospital setting." Value in Health 12 (7): A278. | Saudi Arabia | Cost minimization analysis | Not applicable | Treatment duration, adverse event frequency and central venous access management from the non-inferiority phase III clinical trial | Drug acquisition costs were estimated using published literature. Drug administration costs and hospitalization costs were calculated using values derived from a Saudi Arabian-specific survey and observation. |
| 2 | Ashraf, T. M. and J. P. Alain (2010). "Anti-hepatitis B core testing of blood donors- Oman experience." Vox Sanguinis 1): 285. | Oman | Cost effectiveness analysis | Risk of transmission of HBV; a pilot study in the same setting | Not reported | Not reported |
| 3 | Ibrahim, N. (2011). "Pharmacoeconomic impact of dose rounding for cancer therapy." European Journal of Cancer 1): S269-S270. | Saudi Arabia | Partial economic evaluation | Not applicable | Hospital-specific data | Not reported |
| 4 | Pathare, N. A. and K. M. A. Al Hussaini (2011). "Pharmacoeconomic and pharmacogenomic influence of biomarkers in cancer therapy." In Vivo 25 (3): 553. | Oman | Partial economic evaluation | Not applicable | Not reported | Not reported |
| 5 | Shibl, A. M., et al. (2011). "The potential public health benefit of pneumococcal conjugate vaccines in the Kingdom of Saudi Arabia." Value in Health 14 (7): A401. | Saudi Arabia | Cost effectiveness analysis | QALY; Not reported  Pneumococcal serotype distribution, hospitalized pneumonia and acute otitis media (AOM) disease incidence rate; Local study, and data from Turkey and other countries | Not reported | Not reported |
| 6 | Al-Badriyeh, D., et al. (2012). "The economic impact of a cost-effectiveness threshold on the innovative drug expenditure in Qatar." Value in Health 15 (4): A21. | Qatar | Cost effectiveness analysis; local retrospective observational study | QALYs; literature | Drug utilization data from local healthcare provider | Not reported |
| 7 | Alsultan, M., et al. (2012). "Economic evaluation of agomelatine in patients attending private hospitals in saudi arabia." European Psychiatry. Conference: 20th European Congress of Psychiatry, EPA 27(SUPPL. 1). | Saudi Arabia | Cost effectiveness analysis | Remission rates, time to remission and potential adverse events occurrence; head to head clinical trials and meta-analysis  QALY; international literature | Not reported | Not reported |
| 8 | Delgleize, E. and O. Topachevskyi (2012). "Clinical and economic burden of community acquired pneumonia in 7 countries. a comparison with invasive pneumococcal disease." Value in Health 15 (7): A401. | Saudi Arabia, UK, Canada, Czech Republic, Sweden, Turkey, and Taiwan | Cost effectiveness analysis | Not reported; published literature in the seven countries | Not reported | Published literature in the seven countries |
| 9 | Dhahi, S. A. (2012). "Home health care services: Necessity and cost effectiveness." European Geriatric Medicine 1): S66. | Saudi Arabia | Partial economic evaluation | Frequency of visits to emergency room and specialty clinics; not reported | Not reported | Not reported |
| 10 | Isma'eel, H., et al. (2012). "Applying guidelines to use statins for primary prevention of CV events: Not all Middle Eastern countries can afford it." Circulation 125 (19): e678-e679. | Bahrain, Kuwait, Saudi Arabia, UAE, Oman, Jordan and Lebanon | Cost effectiveness analysis | preventing cardiovascular event; published literature | Not reported | The cost of treatment calculated using National Drug Registries data |
| 11 | Shibl, A., et al. (2012). "The estimated cost-effectiveness of paediatric rotavirus vaccination in the Kingdom of Saudi Arabia." International Journal of Infectious Diseases 16 (SUPPL.1): e340. | Saudi Arabia | Cost effectiveness analysis | Utility; published sources, databases, and validated with experts | Not reported | published sources, databases, and validated with experts |
| 12 | Todorova, L., et al. (2012). "Evaluation of the long term economic impact of improving HbA1c in type 2 diabetes patients in Saudi Arabia." Value in Health 15 (7): A499-A500. | Saudi Arabia | Cost effectiveness analysis | Life expectancy, time free from diabetes-related complications; not reported | Not reported | Not reported |
| 13 | Yassin, M., et al. (2012). "Mortality morbidity and cost effectiveness in patients with febrile neutropenia an experience from Qatar." Haematologica 1): 556-557. | Qatar | Cost effectiveness analysis | Long term objective of improved cancer survival, reduction in morbidity, mortality, and length of stay in hospital; not reported | Not reported | Not reported |
| 14 | Home, P. D., et al. (2013). "Short and long-term cost-effectiveness of starting biphasic insulin aspart 30 in insulin-naive people with type-2 diabetes." Value in Health 16 (3): A164. | Saudi Arabia, India, Indonesia, Malaysia, and Algeria | Cost effectiveness analysis | Clinical effectiveness, adverse events, and patient reported outcomes using the EQ-5D questionnaire; observational study in Saudi Arabia, India, Indonesia, Malaysia, and Algeria | Not reported | Country-specific costs from an observational study in Saudi Arabia, India, Indonesia, Malaysia, and Algeria |
| 15 | Home, P. D., et al. (2013). "Short and long-term cost-effectiveness of switching therapy from biphasic human insulin 30 to biphasic insulin Aspart 30 in people with type-2 diabetes." Value in Health 16 (3): A164. | Saudi Arabia, India, Indonesia, and Malaysia | Cost effectiveness analysis | Clinical effectiveness, adverse events, and patient reported outcomes using the EQ-5D questionnaire; observational study in Saudi Arabia, India, Indonesia, and Malaysia | Not reported | Country-specific costs from an observational study in Saudi Arabia, India, Indonesia, and Malaysia |
| 16 | Home, P. D., et al. (2013). "Short and long-term cost-effectiveness of switching therapy from insulin glargine to biphasic insulin Aspart 30 in people with type-2 diabetes in Saudi Arabia and India." Value in Health 16 (3): A164. | Saudi Arabia and India | Cost effectiveness analysis | Clinical effectiveness, adverse events, and patient reported outcomes using the EQ-5D questionnaire; observational study in Saudi Arabia, and India | Not reported | Country-specific costs from an observational study in Saudi Arabia, and India |
| 17 | Home, P. D., et al. (2013). "Short and long-term cost-effectiveness of switching therapy from NPH insulin to insulin detemir in people with type 2 diabetes." Value in Health 16 (7): A690. | Saudi Arabia and South Korea | Cost effectiveness analysis | Clinical effectiveness, adverse events, and patient reported outcomes using the EQ-5D questionnaire; observational study in Saudi Arabia, and South Korea | Not reported | Country-specific costs from an observational study in Saudi Arabia, and South Korea |
| 18 | Malek, R., et al. (2013). "Short and long-term cost-effectiveness of switching therapy from insulin glargine to insulin detemir in people with type 2 diabetes." Value in Health 16 (7): A690. | Saudi Arabia, South Korea, and Algeria | Cost effectiveness analysis | Clinical effectiveness, adverse events, and patient reported outcomes using the EQ-5D questionnaire; observational study in Saudi Arabia, South Korea, and Algeria | Not reported | Country-specific costs from an observational study in Saudi Arabia, South Korea, and Algeria |
| 19 | Alomi, Y., et al. (2014). "Population-based cost-efficiency simulation of partial versus complete thromboprophylaxis in hospitalized patients in Saudi Arabia: Application of a British model." Value in Health 17 (7): A533. | Saudi Arabia | Partial economic evaluation | NA | Not reported | Not reported |
| 20 | Alomi, Y. A., et al. (2015). "Cost-efficiency of of national drug information center through ministry of healh hotline calling services (937) in Saudi Arabia: Application of a Mercian model." Value in Health 18 (7): A735. | Saudi Arabia | Partial economic evaluation | NA | Not reported | Not reported |
| 21 | Stephens, J. M., et al. (2015). "An economic comparison of linezolid and vancomycin for the treatment of methicillin-resistant staphyloccocus aureus (MRSA) related complicated skin and skin structure infections (CSSSI) in the Kingdom of Saudi Arabia." Value in Health 18 (3): A238. | Saudi Arabia | Cost minimization analysis | Equal efficacy; assumption | Published literature and local expert opinion | local sources and expert feedback |
| 22 | Schubert, A., et al. (2015). "Cost of reaching defined hba1c target using canagliflozin compared to dapagliflozin as add-on to metformin in patients with type 2 diabetes mellitus (T2DM) in the United Arab Emirates (UAE)." Value in Health 18 (7): A608. | UAE | Partial economic evaluation | NA | Not reported | Not reported |
| 23 | Alomi, Y. A. and A. O. Fallatah (2016). "Cost avoidance of pharmacist running pediatrics total parenteral nutrition services at ministry of health in Saudi Arabia." Value in Health 19 (7): A461. | Saudi Arabia | Partial economic evaluation | NA | Not reported | Estimation |
| 24 | Alomi, Y. A. (2016). "Cost-efficiency of clinical pharmacy services at ministry of health in Saudi Arabia application of American model." Value in Health 19 (7): A482-A483. | Saudi Arabia | Partial economic evaluation | NA | Not reported | Not reported |
| 25 | Alomi, Y. A., et al. (2016). "Cost-efficiency of medication safety program at pediatrics, obstetrics and gynecology Hospital, East Province, Saudi Arabia." Value in Health 19 (7): A464 | Saudi Arabia | Partial economic evaluation | NA | Not reported | Not reported |
| 26 | Alaboudi, I. S. (2016). "Cost effectiveness of a diabetes self-management education programme of type 2 diabetes patients in Riyadh, Saudi Arabia." Value in Health 19 (3): A17. | Saudi Arabia | Cost effectiveness analysis | Unit improvement in glycaemic control (HbA1c), TC, LDL-C, HDL-C, SBP, DBP and BMI; Not reported | Not reported | Not reported |
| 27 | Alhammad, A. and S. Garrido Lecca (2016). "Cost-effectiveness of nivolumab for the treatment of advanced non-squamous non-small cell lung cancer (NSCLC) in Saudi Arabia." Value in Health 19 (7): A741. | Saudi Arabia | Cost effectiveness analysis | Utilities and clinical data; clinical trial | Local data | Local data |
| 28 | Osenenko, K. M., et al. (2016). "Cost-effectiveness of apixaban for the treatment of atrial fibrillation patients in the Kingdom of Saudi Arabia." Value in Health 19 (7): A652. | Saudi Arabia | Cost effectiveness analysis | Utilities; published literature | Not reported | Published price lists, UK and national costs |
| 29 | AbuShanab, D., et al. (2017). "Pharmacoeconomics analysis of morphine monotherapy versus morphine plus midazolam combination for critically ill neonates undergoing mechanical ventilation at the intensive care setting in Qatar." Value in Health 20 (5): A220-A221. | Qatar | Cost effectiveness analysis | Sedation success defined as the Premature Infant Pain Profile scoring scale; a retrospective cohort evaluation | a retrospective cohort evaluation in Qatar | a retrospective cohort evaluation in Qatar |
| 30 | AbuShanab, D., et al. (2017). "Cost-effectiveness analysis of morphine monotherapy versus fentanyl monotherapy in the management of neonates undergoing mechanical ventilation in the intensive care setting in Qatar." Value in Health 20 (5): A220. | Qatar | Cost effectiveness analysis | Sedation success defined as the Premature Infant Pain Profile scoring scale; a retrospective cohort evaluation in Qatar | a retrospective cohort evaluation in Qatar | a retrospective cohort evaluation in Qatar |
| 31 | Alhammad, A., et al. (2017). "Cost per responder analysis comparing Secukinumab Vs adalimumab for the treatment of ankylosing spondylitis at 52 weeks in Saudi Arabia." International Journal of Rheumatic Diseases 20 (Supplement 1): 60. | Saudi Arabia | Partial economic evaluation | Response rate | Not reported | Saudi Food and Drug Authority registration costs |
| 32 | Alhammad, A., et al. (2017). "Cost per responder analysis comparing secukinumab vs adalimumab for the treatment of psoriatic arthritis at 48 weeks in Saudi Arabia." International Journal of Rheumatic Diseases 20 (Supplement 1): 60. | Saudi Arabia | Partial economic evaluation | Response rate based on the American College of Rheumatology outcomes (ACR20/50/70) | Not reported | Saudi Food and Drug Authority registration costs |
| 33 | Alhammad, A., et al. (2017). "Cost per responder analysis comparing secukinumab vs etanercept for the treatment of psoriatic arthritis at 24 weeks in Saudi Arabia." International Journal of Rheumatic Diseases 20 (Supplement 1): 60. | Saudi Arabia | Partial economic evaluation | Response rate based on the American College of Rheumatology outcomes (ACR 20/50/70) | Not reported | Saudi Food and Drug Authority registration costs |
| 34 | Alhammad, A., et al. (2017). "Cost per responder analysis comparing secukinumab Vs infliximab for the treatment of psoriatic arthritis at 48 weeks in Saudi Arabia." International Journal of Rheumatic Diseases 20 (Supplement 1): 60. | Saudi Arabia | Partial economic evaluation; prospective study | Response rate based on the American College of Rheumatology outcomes (ACR 20/50/70) | Not reported | Saudi Food and Drug Authority registration costs |
| 35 | Alsultan, M., et al. (2017). "Metformin extended versus immediate release in Saudi Arabia: A cost-effectiveness analysis." Value in Health 20 (9): A479. | Saudi Arabia | Cost effectiveness analysis | QALY, time to insulin therapy, time spent with diabetes complications and lifetime costs; UKPDS modelling framework and Saudi Arabia specific data | Unclear, Saudi Arabia specific data was included whenever available | Unclear, Saudi Arabia specific data was included whenever available |
| 36 | Elkalyoubi, M., et al. (2017). "The cost-effectiveness of IVF treatments gonal-f versus HP-hMG in the United Urab Emirates (UAE)." Value in Health 20 (9): A522. | UAE | Cost effectiveness analysis; decision tree analysis | Live born, new IVF treatment cycle, or stopping IVF; Not reported | Not reported | Not reported |
| 37 | Garrido Lecca, S., et al. (2017). "Cost-utility of nivolumab against docetaxel for the treatment of advanced non-squamous non-small cell lung cancer (NSCLC) in united arab emirates (UAE)." Value in Health 20 (5): A112-A113. | UAE | Cost utility analysis | QALYs and clinical data; clinical trial | Local expert opinion Delphi exercise | Local institutions price indices and expert opinion Delphi exercise |
| 38 | Hren, R. and M. Milanic (2017). "Cost-effectiveness comparison of opoid substitution therapy vs. non-pharmcologic therapy in the state of Kuwait." Value in Health 20 (9): A711. | Kuwait | Cost effectiveness analysis | QALY; not reported | Not reported | 1st model: using locally specific data, 2nd model: UK data adjusted to conditions of the local jurisdiction |
| 39 | Li, X., et al. (2017). "Would a two-dose rotavirus vaccine improve health outcomes while reducing costs in the sultanate of Oman?" Value in Health 20 (9): A634. | Oman | Cost effectiveness analysis | Acute rotavirus events; Published sources  QALYs; not reported | Not reported | Published sources and Publicly available prices for the Gulf Cooperation Council |
| 40 | Mahmeed, W. A., et al. (2017). "Burden of cardiovascular disease (CVD) for patients with familial hypercholesterolemia (FH) or atherosclerotic CVD (ASCVD) and the impact of low density lipoprotein-cholesterol (LDL-C) lowering in two middle east countries." Value in Health 20 (9): A610. | Saudi Arabia and UAE | Cost effectiveness analysis | QALY, the impact on CV events; published randomized trial and meta-analysis | Not reported | Not reported |
| 41 | Nuhoho, S., et al. (2017). "Economic evaluation of paliperidone palmitate for treating chronic schizophrenia patients in the UAE." Value in Health 20 (5): A297-A298. | UAE | Cost-utility analysis | QALY, literature | Not reported | Standard price lists |
| 42 | Al Hamdan, H., et al. (2018). "Cost Per-Responder Analysis of Secukinumab Compared To Other Biologics For The Treatment of Psoriatic Arthritis In Saudi Arabia." Value in Health 21 (Supplement 2): S82. | Saudi Arabia | Partial economic evaluation | Response rate based on the American College of Rheumatology (ACR 20/50/70) outcomes in a biologic-naïve population; published clinical trials | Not reported | Saudi Food and Drug Authority |
|  | Al Howimel, M., et al. (2018). "A Cost-Per-Responder Analysis of Secukinumab Compared with Ustekinumab in Saudi Arabia: Results from the Clear Study of Patients With Moderate to Severe Psoriasis." Value in Health 21 (Supplement 2): S106. | Saudi Arabia | Partial economic evaluation | Psoriasis Area Severity Index (PASI) reduction; Not reported | Not reported | Saudi Food and Drug Authority website and national source |
| 43 | Al Howimel, M., et al. (2018). "Cost Per-Responder Analysis of Secukinumab Compared to Other Biologics for Treatment of Moderate to Severe Psoriasis Patients in Saudi Arabia." Value in Health 21 (Supplement 2): S106. | Saudi Arabia | Partial economic evaluation | Psoriasis Area Severity Index (PASI) reduction; Not reported | Not reported | Saudi Food and Drug Authority website and national source |
| 44 | Al Mudaiheem, H., et al. (2018). "Cost Per-Responder Analysis of Secukinumab Compared To Adalimumab For The Treatmenmt of Ankylosing Spondylitis Over One Year In Saudi Arabia." Value in Health 21 (Supplement 2): S81-S82. | Saudi Arabia | Partial economic evaluation | Response rate based on the Assessment of Spondyloarthritis International Society (ASAS) outcomes in a TNF-naïve population; clinical trials | Not reported | Saudi Food and Drug Authority |
| 45 | Alowairdhi, M. (2018). "The cost-effectiveness of treatments in non-cirrhotic Saudi Arabian patients with genotype 1 and genotype 4 chronic hepatitis C." Value in Health 21 (Supplement 1): S84. | Saudi Arabia | Cost effectiveness analysis | Life-years gained; not reported | Not reported | Saudi Food and Drug Authority |
| 46 | Zaitoun, M., et al. (2018). "Pharmacists' Involvement in rationalization of valganciclovir use in cytomegalovirus prophylaxis for renal transplant patients: A pilot single center study." Pharmacoepidemiology and Drug Safety 27 (Supplement 2): 508-509. | Saudi Arabia | Partial economic evaluation | Number of pharmacists' recommendations and percentage of physicians' acceptance, and days of therapy reduced; local retrospective study | Not reported | Not reported |
| 47 | AlJohani, M., et al. (2019). "Development of a stroke care network in the hail region of Saudi Arabia." European Stroke Journal 4 (Supplement 1): 662. | Saudi Arabia | Cost effectiveness analysis | QALY; international literature validated by local experts | Local data | Local data |
| 48 | K.A, E. M., et al. (2019). "A Comparison of Pneumococcal Vaccination Strategies and the Estimated Public Health and Economic Impact in Kuwait." Journal of Infection and Public Health 12 (1): 119. | Kuwait | Cost effectiveness analysis | QALY; estimation | Not reported | Expert interviews and estimations |
